# Supplementary material for: Hierarchical porous carbon materials derived from a waste paper towel with ultrafast and ultrahigh performance for adsorption of tetracycline
Source: Royal Society of Chemistry journal article supplement (doi:10.1039/c6ra17286e), 2016-01-01
Supplement: c6ra17286e1.pdf [file c6ra17286e1.pdf]

**Hierarchical porous carbon materials derived from waste paper towel with ultrafast and  
ultrahigh performance for adsorption of tetracycline**

Atian Xie<sup>a</sup>, Jiangdong Dai<sup>a</sup>, Xiang Chen<sup>a</sup>, Jinsong He<sup>a</sup>, Zhongshuai Chang<sup>a</sup>, Yongsheng Yan<sup>a,b\*</sup>,  
Chunxiang Li<sup>a\*</sup>

<sup>a</sup> School of Chemistry and Chemical Engineering, Jiangsu University, Zhenjiang 212013, China

<sup>b</sup> Key Laboratory of Preparation and Applications of Environmental Friendly Materials (Ministry  
of Education), Jilin Normal University, Siping 136000, China

Corresponding Author: Yongsheng Yan

E-mail: [cjy18252586640@163.com](mailto:cjy18252586640@163.com)

Tel: +86 0511-88790683; Fax: +86 0511-88791800

The  $pH_{PZC}$  of PTHPC was measured by pH drift method. (in Supporting Information).

**pH drift method:**<sup>1, 2</sup>

The  $pH_{PZC}$  of PTHPC was measured by pH drift method.  $pH_{PZC}$  (point of zero charge) is pH when the charge in the adsorbent surface is zero. In detailed, a number of aqueous solutions (50 mL) were prepared with 0.01M NaCl and added into a series of Erlenmeyer. Then, the pH values were adjusted to an initial pH value of 2, 3, 4, 5, 6, 7, 8, 9, 10 using 0.1 M NaOH and 0.1 M HCl solution. Initial pH of solutions were measured and then noted as  $pH_{initial}$ . After  $pH_{initial}$  have reached a constant value, PTHPC (0.2 g) was added into each Erlenmeyer and then shaken for 24 h. Then, pH of solution was measured and noted as  $pH_{final}$ .  $pH_{PZC}$  of PTHPC is the point when  $pH_{initial} = pH_{final}$ .

Quantification of the surface functional groups was determined by Boehm titration <sup>3</sup>. (Supporting Information)

The procedure of Boehm titration as follow:

- 1) The PTHPC of 0.2 g was added to the base solutions (0.1 M, 20 mL each) as stated below in conical flask.
  - a)  $NaHCO_3$  ( $pK_a = 6.37$ ) (neutralizes the carboxylic groups on the adsorbent).
  - b)  $Na_2CO_3$  ( $pK_a = 10.25$ ) (neutralizes carboxylic and lactonic groups on the adsorbent).
  - c)  $NaOH$  ( $pK_a = 15.74$ ) (neutralizes carboxylic, lactonic and phenolic groups on the adsorbent).
- 2) The slurry with PTHPC was stirred for 48 h at 25 °C.
- 3) The PTHPC was filtered-off and the content of acidic functional groups on PTHPC was estimated after titrating the obtained solution against 0.1 M HCl aqueous solution. Methyl orange was used as an indicator for all titrations.

**References:**

- (1) Prahas, D.; Kartika, Y.; Indraswati, N.; Ismadji, S. Activated carbon from jackfruit peel waste by  $H_3PO_4$  chemical activation: Pore structure and surface chemistry characterization. *Chem. Eng. J.* 2008, 140, 32-42.
- (2) Liu, Q.; Zhong, L. B.; Zhao, Q. B.; Frear, C.; Zheng, Y. M. Synthesis of  $Fe_3O_4$ /polyacrylonitrile composite electrospun nanofiber mat for effective adsorption of tetracycline. *ACS Appl. Mater. Interfaces* 2015, 7, 14573-14583.
- (3) Boehm H.P. Chemical identification of surface groups, *Adv. Catal.* 1966, 16, 179-274.

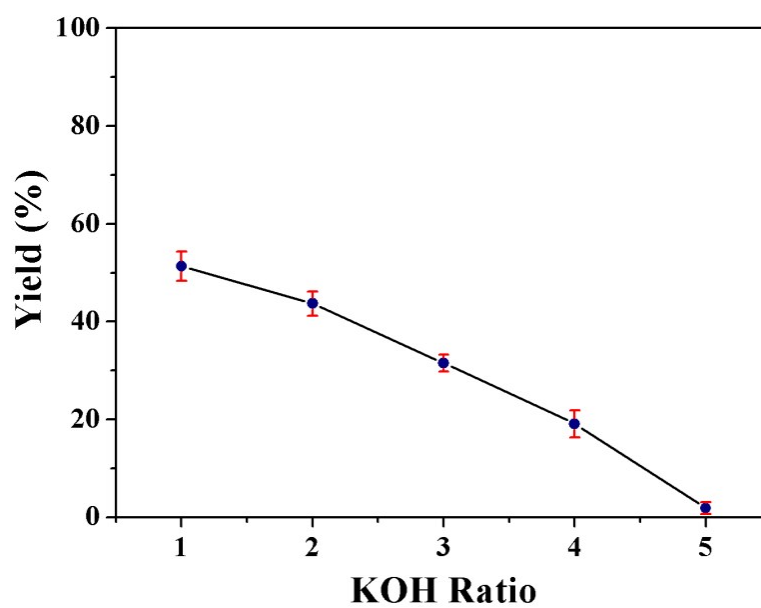

**Figure S1.** Effect of KOH ratio on yield of PTHPC

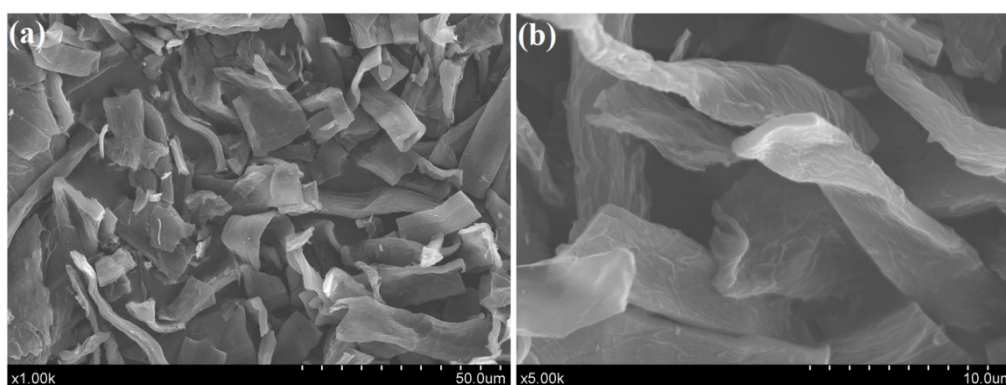

**Figure S2.** SEM images of PTHPC-2

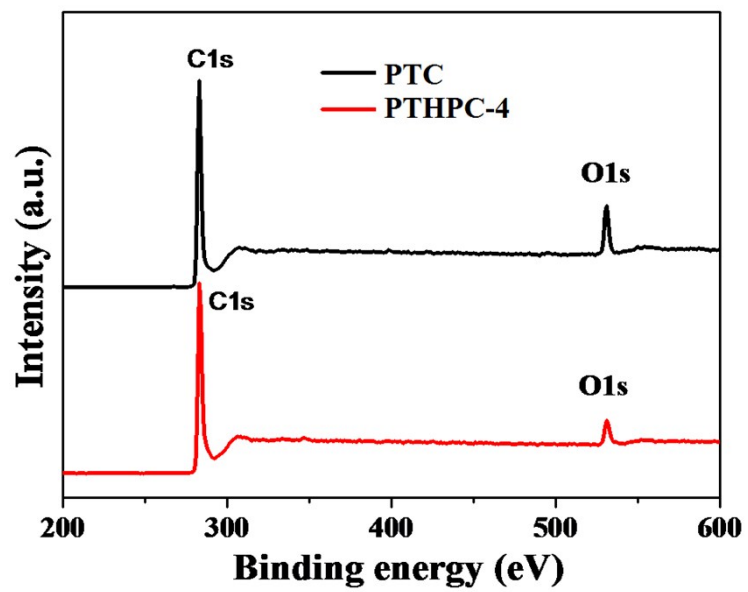

Figure S3. XPS spectra of wide survey scans for PTC and PTHPC-4

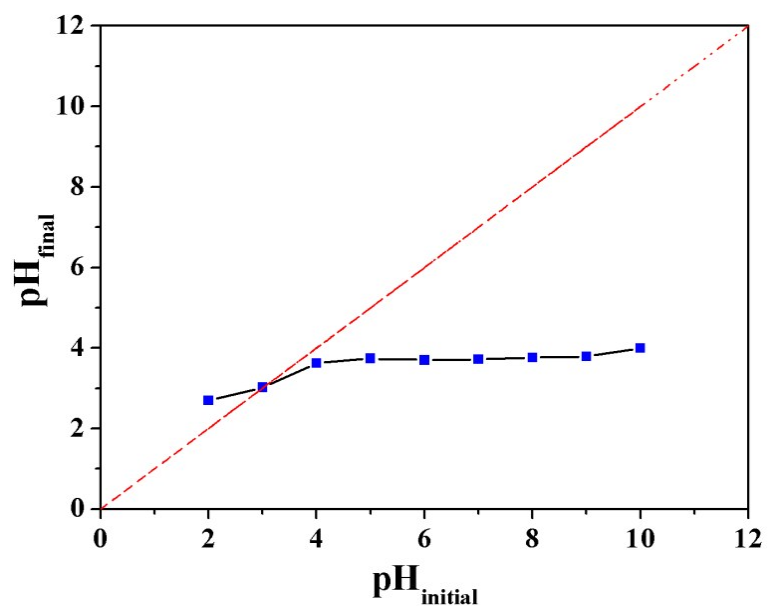

Figure S4.  $\text{pH}_{\text{PZC}}$  determination by pH drift method of PTHPC-4

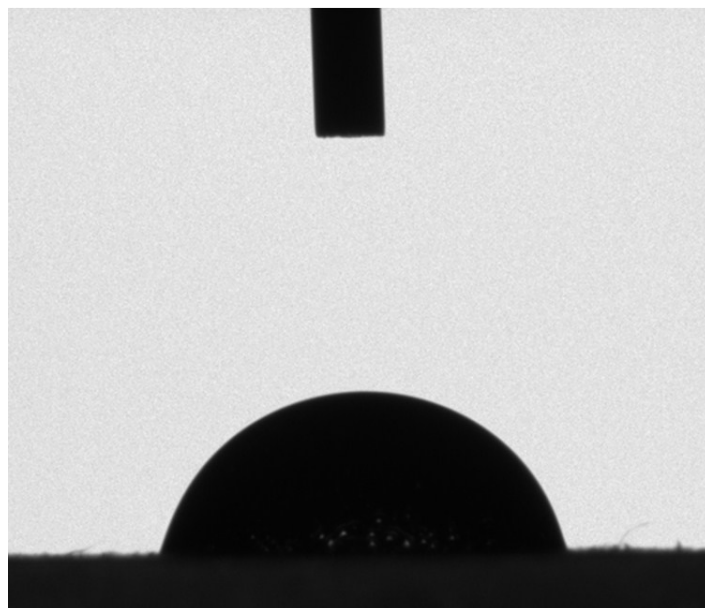

**Figure S5.** Static water contact angle of PTHPC-4

**Table S1.** The detailed percentage of carbon species

| samples | D1<br>(1163 cm <sup>-1</sup> ) | D4<br>(1332 cm <sup>-1</sup> ) | D3<br>(1499 cm <sup>-1</sup> ) | G<br>(1590 cm <sup>-1</sup> ) |
|---------|--------------------------------|--------------------------------|--------------------------------|-------------------------------|
| PTC     | 5.60                           | 42.72                          | 32.25                          | 19.43                         |
| PTHPC-4 | 5.96                           | 64.44                          | 14.65                          | 14.95                         |

**Table S2.** Elemental analysis of the WPT, PTC and PTHPC-4.

| Elements | C (%)    | H (%)    | O (%)     |
|----------|----------|----------|-----------|
| PT       | 39.48639 | 6.095313 | 54.418297 |
| PTC      | 74.90157 | 3.268258 | 21.830172 |
| PTHPC-4  | 93.34456 | 0.516842 | 6.138598  |

**Table S3.** Kinetic parameters of intra-particle diffusion adsorption kinetic model

| $C_0$<br>(mg L <sup>-1</sup> ) | $T$<br>(K) | Intra-particle diffusion model                     |       |       |                                                    |       |       |
|--------------------------------|------------|----------------------------------------------------|-------|-------|----------------------------------------------------|-------|-------|
|                                |            | $K_1$<br>(mg g <sup>-1</sup> min <sup>-0.5</sup> ) | $C_1$ | $R^2$ | $K_2$<br>(mg g <sup>-1</sup> min <sup>-0.5</sup> ) | $C_2$ | $R^2$ |
| 100                            | 298        | 53.52                                              | 372.1 | 0.995 | 1.180                                              | 488.8 | 0.910 |
|                                | 308        | 5.652                                              | 483.9 | 0.973 | 0.397                                              | 495.9 | 0.858 |
|                                | 318        | 7.604                                              | 481.2 | 0.998 | 0.153                                              | 497.8 | 0.911 |
| 150                            | 298        | 40.05                                              | 639.6 | 0.970 | 2.218                                              | 729.2 | 0.931 |
|                                | 308        | 15.8                                               | 702   | 0.992 | 1.875                                              | 733.5 | 0.922 |
|                                | 318        | 7.619                                              | 726.5 | 0.997 | 0.676                                              | 742.3 | 0.962 |
| 200                            | 298        | 109.6                                              | 604.3 | 0.994 | 19.76                                              | 811.6 | 0.969 |
|                                | 308        | 16.63                                              | 891.2 | 0.961 | 6.441                                              | 920.1 | 0.926 |
|                                | 318        | 22.84                                              | 915.2 | 0.998 | 3.436                                              | 961   | 0.955 |
